# Supplementary material for: Tetraphenylethene modified β-ketoiminate boron complexes bearing aggregation-induced emission and mechanofluorochromism
Source: Royal Society of Chemistry journal article supplement (doi:10.1039/c6ra25871a), 2017-01-01
Supplement: c6ra25871a1.pdf [file c6ra25871a1.pdf]

# **Tetraphenylethene Modified $\beta$ -Ketoiminate Boron Complexes Bearing Aggregation-Induced Emission and Mechanofluorochromism**

Huaizhi Gao,<sup>‡a</sup> Defang Xu,<sup>‡b</sup> Xingliang Liu,<sup>a\*</sup> Aixia Han,<sup>a</sup> Lin Zhou,<sup>a</sup> Chao Zhang,<sup>a</sup>  
Yan Yang,<sup>a</sup> and Wenlin Li<sup>a</sup>

<sup>a</sup>Chemical Engineering College, Qinghai University, Xining 810016, China

<sup>b</sup>Key Lab of Comprehensive and Highly Efficient Utilization of Salt Lake Resources,  
Qinghai Institute of Salt Lakes, Chinese Academy of Sciences, Xining 810008, China

\*To whom correspondence should be addressed. E-mail: [liuxl1219@163.com](mailto:liuxl1219@163.com).

<sup>‡</sup>These authors contributed equally to this work.

**Table S1.** Photophysical data of **TTPE-H** in different solvents.

| solvent         | Viscosity (cP at 20 °C) | $\lambda_{\text{abs}}$ (nm) | $\epsilon^{\text{max}}$ ( $\text{M}^{-1} \text{cm}^{-1}$ ) | $\lambda_{\text{em}}$ (nm) | $\Delta\nu_{\text{st}}^{\text{a}}$ ( $\text{cm}^{-1}$ ) | $\Phi_{\text{f}}^{\text{b}}$ | $\tau^{\text{c}}$ (ns) | $K_{\text{f}}^{\text{d}}/K_{\text{nr}}^{\text{e}}$ ( $10^9 \text{ s}^{-1}$ ) |
|-----------------|-------------------------|-----------------------------|------------------------------------------------------------|----------------------------|---------------------------------------------------------|------------------------------|------------------------|------------------------------------------------------------------------------|
| Hexane          | 0.31                    | 401                         | 46100                                                      | 480                        | 4104                                                    | 0.015                        | 1.87                   | 0.0080/0.5267                                                                |
| Cyclohexane     | 1.00                    | 303, 403                    | 48300                                                      | 485                        | 4195                                                    | 0.009                        | 1.66                   | 0.0054/0.5970                                                                |
| Toluene         | 0.59                    | 303, 405                    | 43600                                                      | 495                        | 4489                                                    | 0.007                        | 1.52                   | 0.0046/0.6533                                                                |
| THF             | 0.55                    | 305, 402                    | 46300                                                      | 508                        | 5191                                                    | 0.004                        | — <sup>f</sup>         | —/—                                                                          |
| DCM             | 0.44                    | 302, 402                    | 45100                                                      | 528                        | 5936                                                    | 0.005                        | — <sup>f</sup>         | —/—                                                                          |
| DMF             | 0.92                    | 302, 401                    | 44600                                                      | 532                        | 6141                                                    | 0.003                        | — <sup>f</sup>         | —/—                                                                          |
| DMSO            | 2.24                    | 304, 403                    | 45000                                                      | 542                        | 6364                                                    | 0.005                        | — <sup>f</sup>         | —/—                                                                          |
| Ethylene glycol | 23.5                    | 305, 405                    | 31800                                                      | 518                        | 5386                                                    | 0.105                        | 0.79                   | 0.1329/1.1329                                                                |
| Glycerol        | 1412                    | 406                         | 28500                                                      | 501                        | 4670                                                    | 0.165                        | 0.98                   | 0.1684/0.8520                                                                |

<sup>a</sup> $\Delta\nu_{\text{st}} = \nu_{\text{abs}} - \nu_{\text{em}}$ . <sup>b</sup>The fluorescence quantum yield ( $\Phi_{\text{f}}$ ) was measured using quinine sulfate as a standard ( $\Phi=0.546$  in  $0.5 \text{ mol L}^{-1} \text{ H}_2\text{SO}_4$ ) as standard. <sup>c</sup>Fluorescence lifetime. <sup>d</sup>Radiative rate constant  $K_{\text{f}} = \Phi_{\text{f}}/\tau$ . <sup>e</sup>Nonradiative rate constant  $K_{\text{nr}} = (1 - \Phi_{\text{f}})/\tau$ . <sup>f</sup>Too short to be measured ( $<0.1$  ns).

**Table S2.** Photophysical data of **TTPE-CN** in different solvents.

| solvent         | Viscosity (cP at 20 °C) | $\lambda_{\text{abs}}$ (nm) | $\epsilon^{\text{max}}$ ( $\text{M}^{-1} \text{cm}^{-1}$ ) | $\lambda_{\text{em}}$ (nm) | $\Delta\nu_{\text{st}}^{\text{a}}$ ( $\text{cm}^{-1}$ ) | $\Phi_{\text{f}}^{\text{b}}$ | $\tau^{\text{c}}$ (ns) | $K_{\text{f}}^{\text{d}}/K_{\text{nr}}^{\text{e}}$ ( $10^9 \text{ s}^{-1}$ ) |
|-----------------|-------------------------|-----------------------------|------------------------------------------------------------|----------------------------|---------------------------------------------------------|------------------------------|------------------------|------------------------------------------------------------------------------|
| Hexane          | 0.31                    | 408                         | 22800                                                      | 498                        | 4429                                                    | 0.025                        | 1.58                   | 0.0158/0.6171                                                                |
| Cyclohexane     | 1.00                    | 302, 410                    | 21900                                                      | 519                        | 5122                                                    | 0.005                        | 1.32                   | 0.0038/0.7538                                                                |
| Toluene         | 0.59                    | 301, 409                    | 38500                                                      | 529                        | 5546                                                    | 0.004                        | 1.09                   | 0.0037/0.9138                                                                |
| THF             | 0.55                    | 304, 402                    | 38300                                                      | 565                        | 7177                                                    | 0.003                        | — <sup>f</sup>         | —/—                                                                          |
| DCM             | 0.44                    | 304, 405                    | 37900                                                      | 583                        | 7539                                                    | 0.001                        | — <sup>f</sup>         | —/—                                                                          |
| DMF             | 0.92                    | 303, 397                    | 35900                                                      | 607                        | 8714                                                    | 0.002                        | — <sup>f</sup>         | —/—                                                                          |
| DMSO            | 2.24                    | 397                         | 35100                                                      | 612                        | 8850                                                    | 0.002                        | — <sup>f</sup>         | —/—                                                                          |
| Ethylene glycol | 23.5                    | 309, 414                    | 19300                                                      | 533                        | 5393                                                    | 0.172                        | 0.83                   | 0.2072/0.9976                                                                |
| Glycerol        | 1412                    | 418                         | 15600                                                      | 514                        | 4468                                                    | 0.204                        | 1.09                   | 0.1872/0.7303                                                                |

<sup>a</sup> $\Delta\nu_{\text{st}} = \nu_{\text{abs}} - \nu_{\text{em}}$ . <sup>b</sup>The fluorescence quantum yield ( $\Phi_{\text{f}}$ ) was measured using quinine sulfate as a standard ( $\Phi=0.546$  in  $0.5 \text{ mol L}^{-1} \text{ H}_2\text{SO}_4$ ) as standard. <sup>c</sup>Fluorescence lifetime. <sup>d</sup>Radiative rate constant  $K_{\text{f}} = \Phi_{\text{f}}/\tau$ . <sup>e</sup>Nonradiative rate constant  $K_{\text{nr}} = (1 - \Phi_{\text{f}})/\tau$ . <sup>f</sup>Too short to be measured ( $<0.1$  ns).

**Table S3.** Photophysical data of **TTPE-H** and **TTPE-CN** in water/THF mixtures with different water fractions ( $f_w$ ,  $1.0 \times 10^{-5}$  mol L<sup>-1</sup>).

| Compound       | $f_w$ | $\lambda_{\text{abs}}$ (nm) | $\lambda_{\text{em}}$ (nm) | $\Phi_f^a$ | $T^b$ (ns)     | $K_f^c/K_{\text{nr}}^d(10^9 \text{ s}^{-1})$ |
|----------------|-------|-----------------------------|----------------------------|------------|----------------|----------------------------------------------|
| <b>TTPE-H</b>  | 0%    | 402                         | 508                        | 0.0042     | — <sup>e</sup> | —/—                                          |
|                | 20%   | 403                         | 509                        | 0.0043     | — <sup>e</sup> | —/—                                          |
|                | 40%   | 403                         | 507                        | 0.0047     | — <sup>e</sup> | —/—                                          |
|                | 60%   | 403                         | 510                        | 0.0053     | — <sup>e</sup> | —/—                                          |
|                | 70%   | 403                         | 513                        | 0.0056     | — <sup>e</sup> | —/—                                          |
|                | 80%   | 411                         | 508                        | 0.0375     | 0.78           | 0.0481/1.2340                                |
|                | 85%   | 409                         | 508                        | 0.0983     | 0.96           | 0.1024/0.9393                                |
|                | 90%   | 408                         | 513                        | 0.2355     | 1.32           | 0.1784/0.5792                                |
| <b>TTPE-CN</b> | 0%    | 402                         | 565                        | 0.0034     | — <sup>e</sup> | —/—                                          |
|                | 20%   | 403                         | 579                        | 0.0018     | — <sup>e</sup> | —/—                                          |
|                | 40%   | 403                         | 580                        | 0.0019     | — <sup>e</sup> | —/—                                          |
|                | 60%   | 404                         | 583                        | 0.0024     | — <sup>e</sup> | —/—                                          |
|                | 70%   | 403                         | 583                        | 0.0026     | — <sup>e</sup> | —/—                                          |
|                | 80%   | 408                         | 556                        | 0.0224     | 0.77           | 0.0291/1.2696                                |
|                | 85%   | 408                         | 553                        | 0.0699     | 0.99           | 0.0706/0.9395                                |
|                | 90%   | 410                         | 553                        | 0.2082     | 1.39           | 0.1498/0.5696                                |

<sup>a</sup>The fluorescence quantum yield ( $\Phi_f$ ) was measured using fluorescein ( $\Phi=0.79$  in 0.1 M sodium hydroxide water solution) as standard. <sup>b</sup>Fluorescence lifetime, the fluorescence decays can be fitted with a single exponential function. <sup>c</sup>Radiative rate constant  $K_f = \Phi_f/\tau$ . <sup>d</sup>Nonradiative rate constant  $K_{\text{nr}} = (1 - \Phi_f)/\tau$ . <sup>e</sup>Too short to be measured (<0.1 ns).

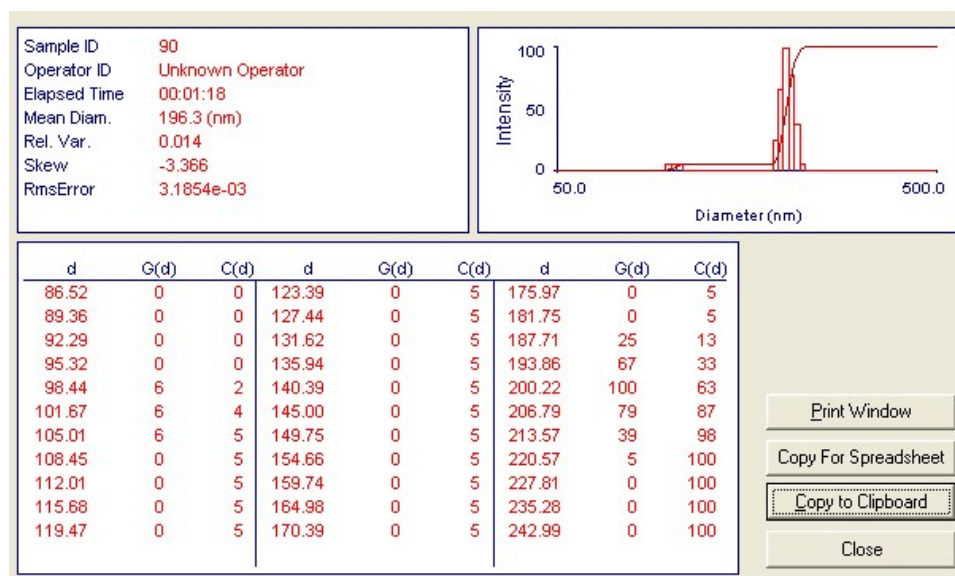

**Fig. S1** DLS data of **TTPE-H** ( $1.0 \times 10^{-5}$  mol L<sup>-1</sup>) in ethylene glycol–THF mixture with ethylene glycol fraction of 90%.

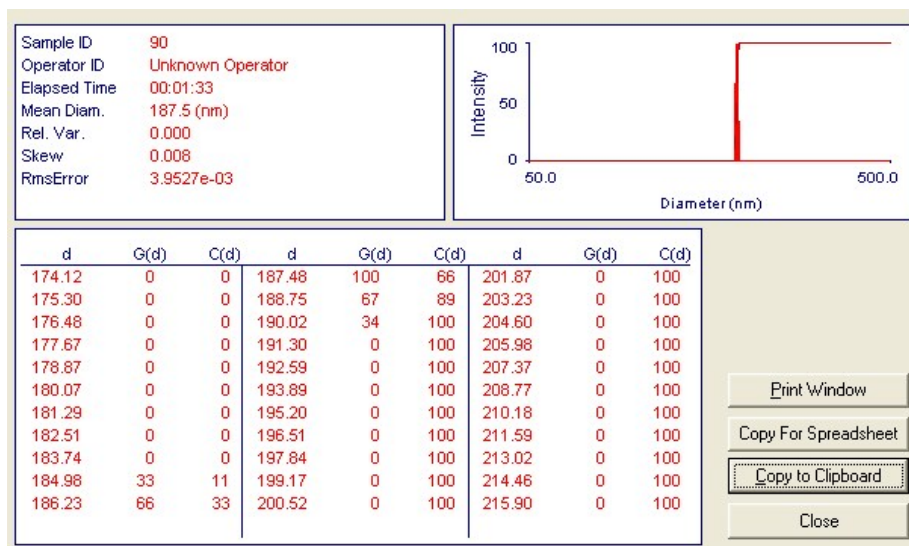

**Fig. S2** DLS data of TTPE-CN ( $1.0 \times 10^{-5}$  mol L<sup>-1</sup>) in ethylene glycol–THF mixture with ethylene glycol fraction of 90%.

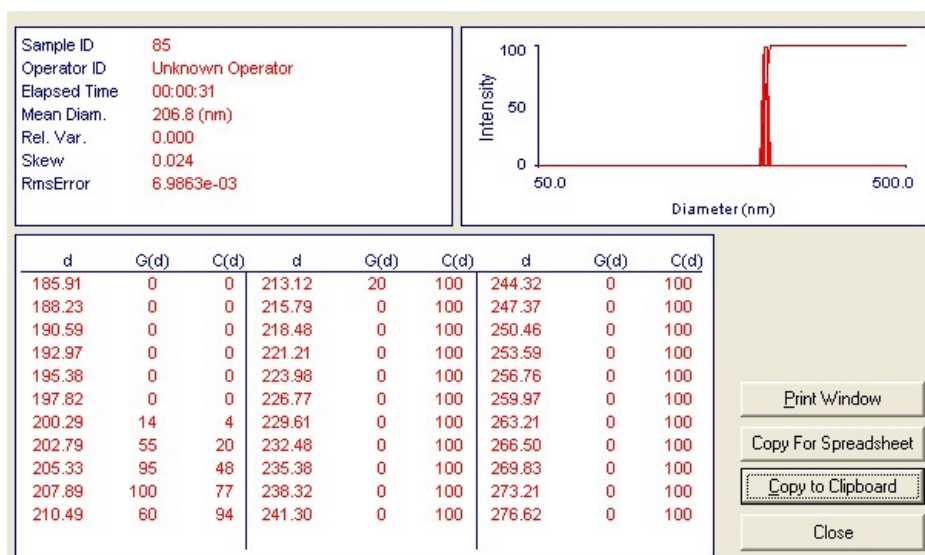

**Fig. S3** DLS data of TTPE-H ( $1.0 \times 10^{-5}$  mol L<sup>-1</sup>) in ethylene glycol–THF mixture with ethylene glycol fraction of 85%.

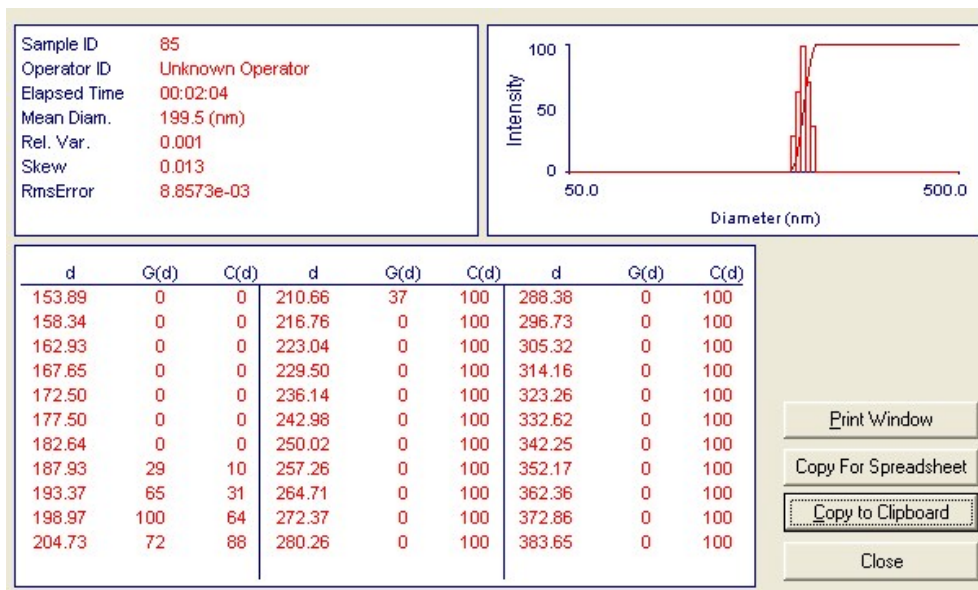

**Fig. S4** DLS data of TTPE-CN ( $1.0 \times 10^{-5}$  mol L<sup>-1</sup>) in ethylene glycol–THF mixture with ethylene glycol fraction of 85%.

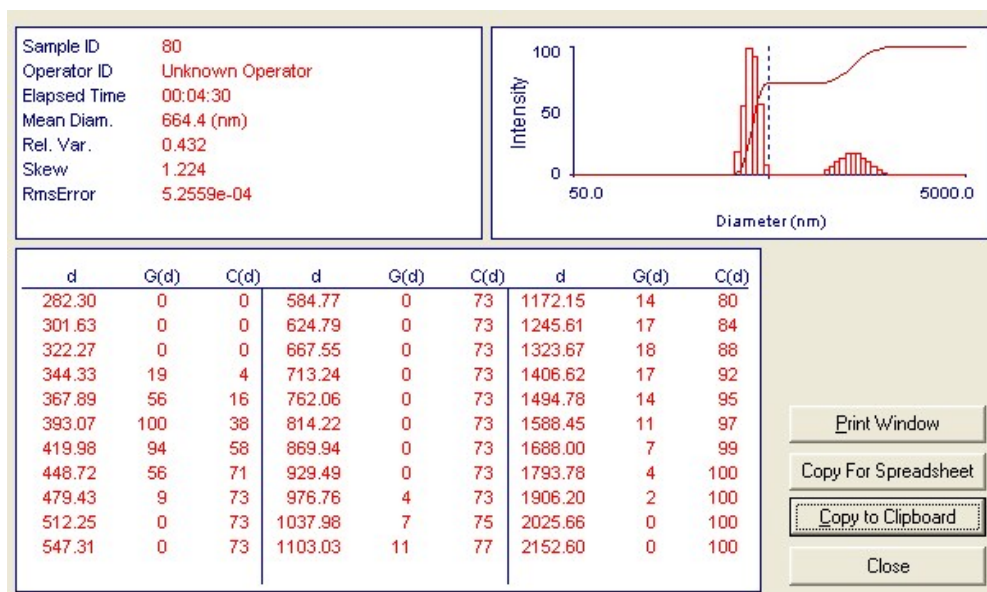

**Fig. S5** DLS data of TTPE-H ( $1.0 \times 10^{-5}$  mol L<sup>-1</sup>) in ethylene glycol–THF mixture with ethylene glycol fraction of 80%.

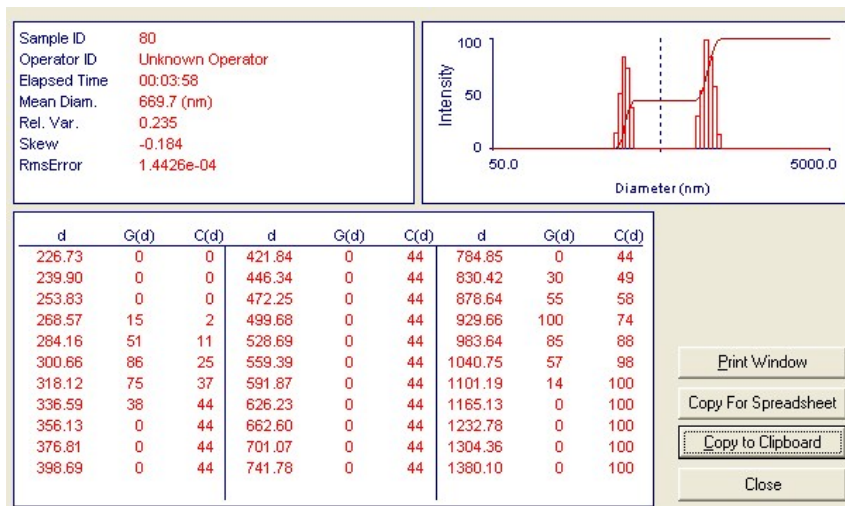

**Fig. S6** DLS data of **TTPE-CN** ( $1.0 \times 10^{-5}$  mol L<sup>-1</sup>) in ethylene glycol–THF mixture with ethylene glycol fraction of 80%.

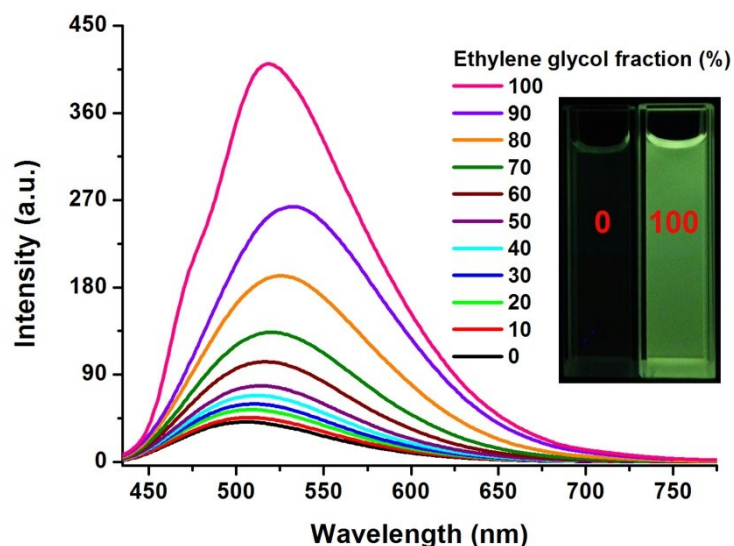

**Fig. S7** PL spectra of **TTPE-H** in ethylene glycol–THF mixtures with different ethylene glycol fractions (from 0% to 100%,  $1.0 \times 10^{-5}$  mol L<sup>-1</sup>, excited at 390 nm). Photographs are **TTPE-H** in THF and ethylene glycol under UV light (365 nm), respectively.

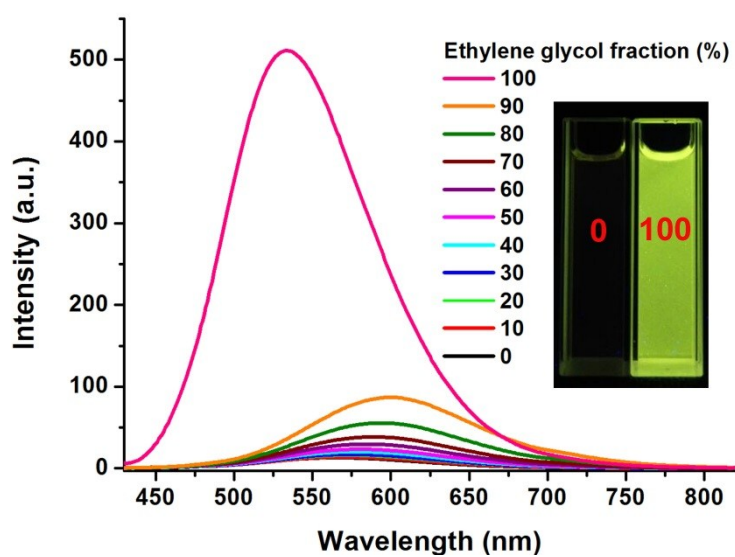

**Fig. S8** spectra of **TTPE-CN** in ethylene glycol–THF mixtures with different ethylene glycol fractions (from 0% to 100%,  $1.0 \times 10^{-5}$  mol L<sup>-1</sup>, excited at 410 nm). Photographs are **TTPE-H** in THF and ethylene glycol under UV light (365 nm), respectively.

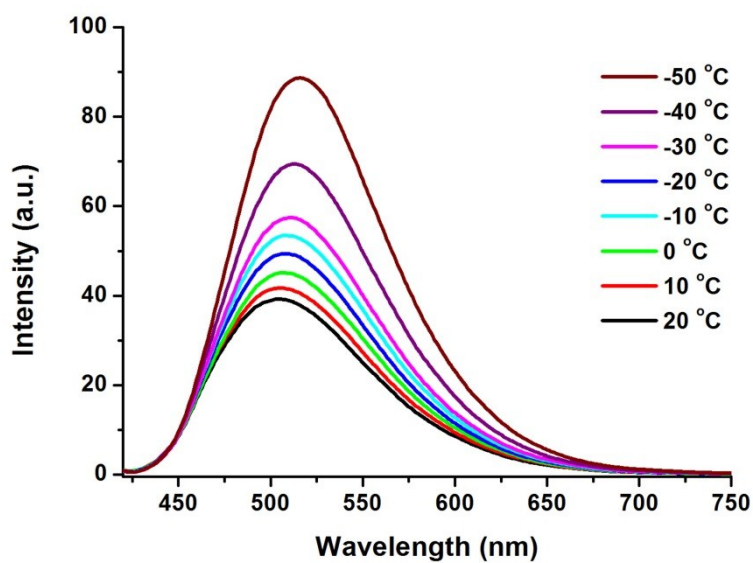

**Fig. S9** PL spectra of **TTPE-H** in THF at different temperature (excited at 390 nm,  $1.0 \times 10^{-5}$  mol L<sup>-1</sup>).



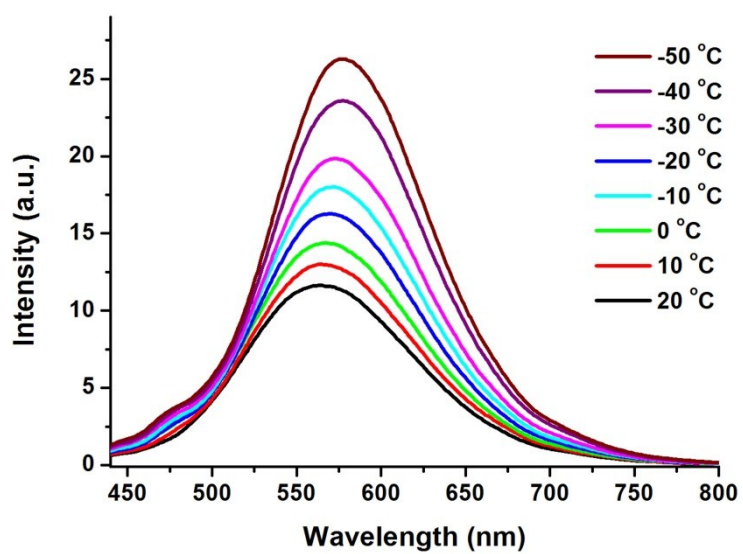

**Fig. S10** PL spectra of **TTPE-CN** in THF at different temperature (excited at 410 nm,  $1.0 \times 10^{-5}$  mol L<sup>-1</sup>).

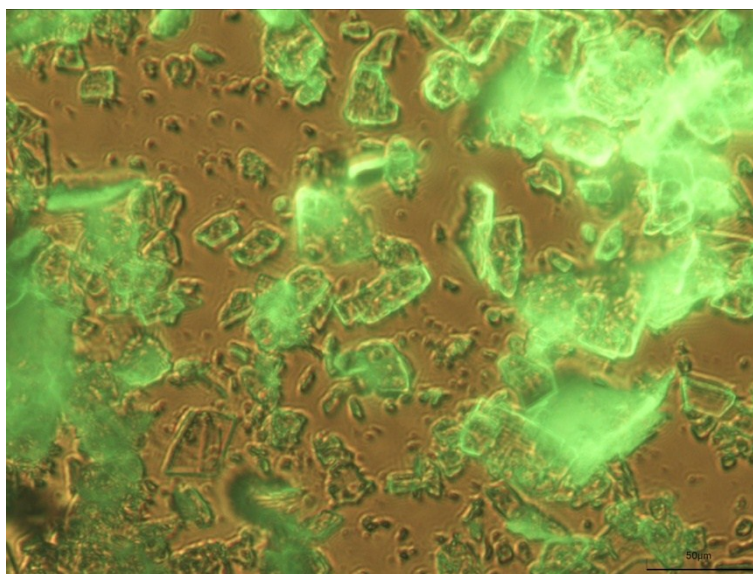

**Fig. S11** Fluorescence microscopy image of **TTPE-H** powders. The excitation wavelength for measurements was 330–385 nm.



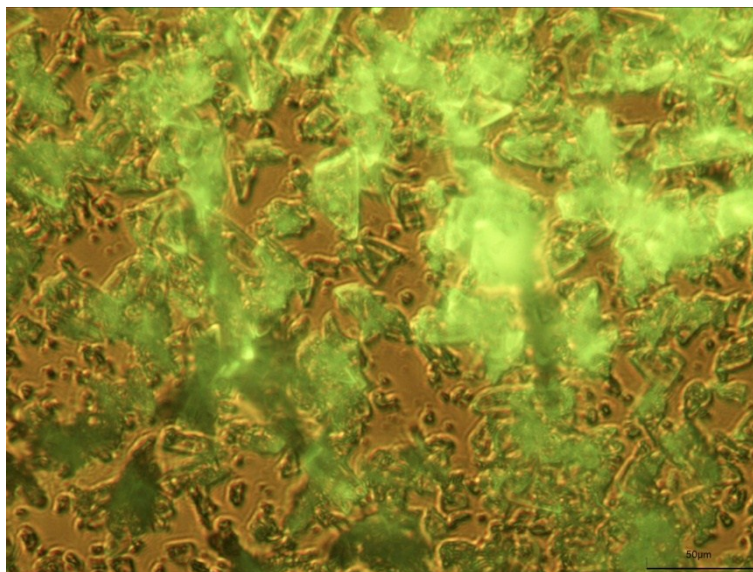

**Fig. S12** Fluorescence microscopy image of TTPE-CN powders. The excitation wavelength for measurements was 330–385 nm.

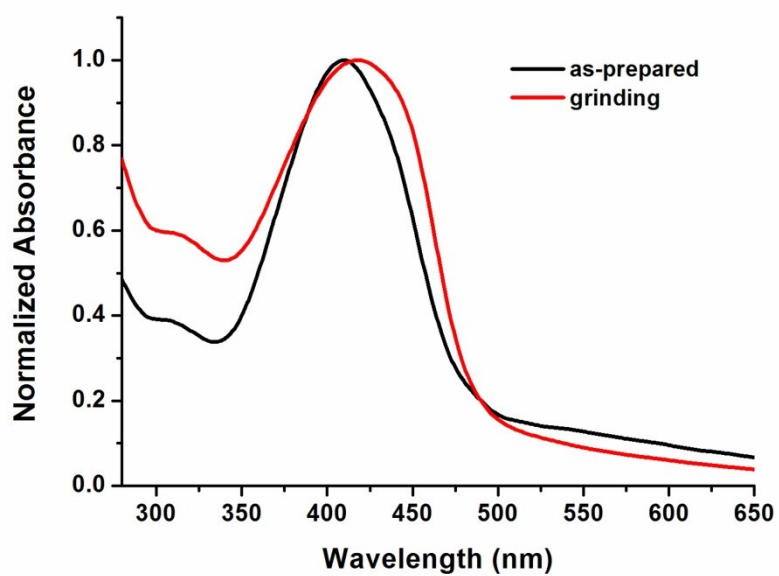

**Fig. S13** Normalized UV-vis absorption spectra of TTPE-H in different solid-states: as-prepared and grinding.

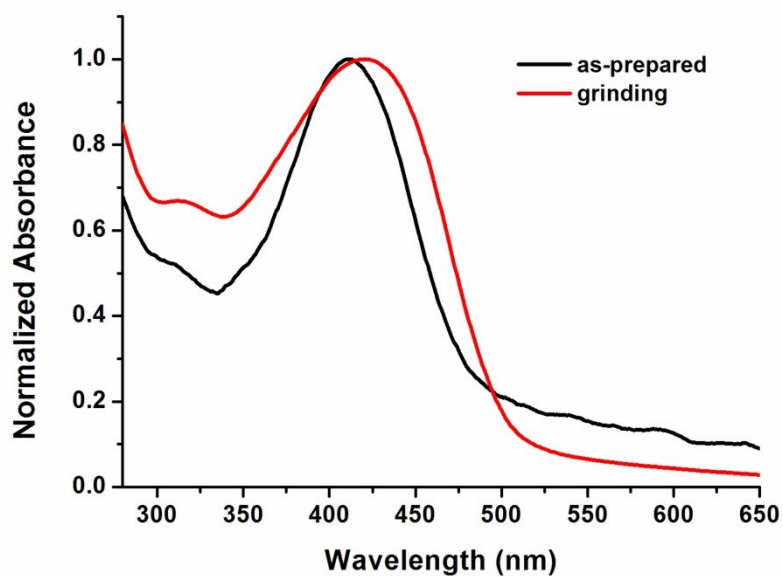

**Fig. S14** Normalized UV-vis absorption spectra of TTPE-CN in different solid-states: as-prepared and grinding.

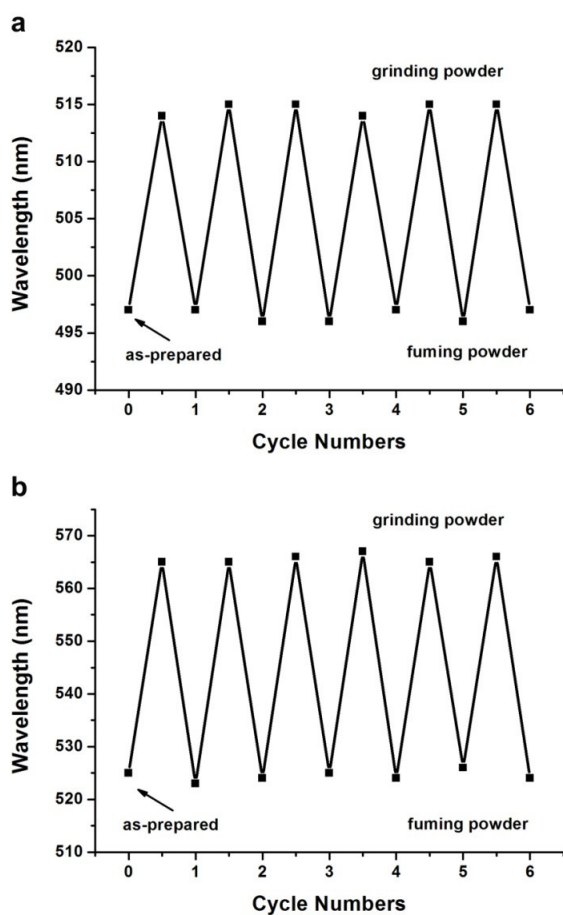

**Fig. S15** Maximum fluorescent emission of TTPE-H (a) and TTPE-CN (b) upon repeating treated by grinding and fuming with DCM.

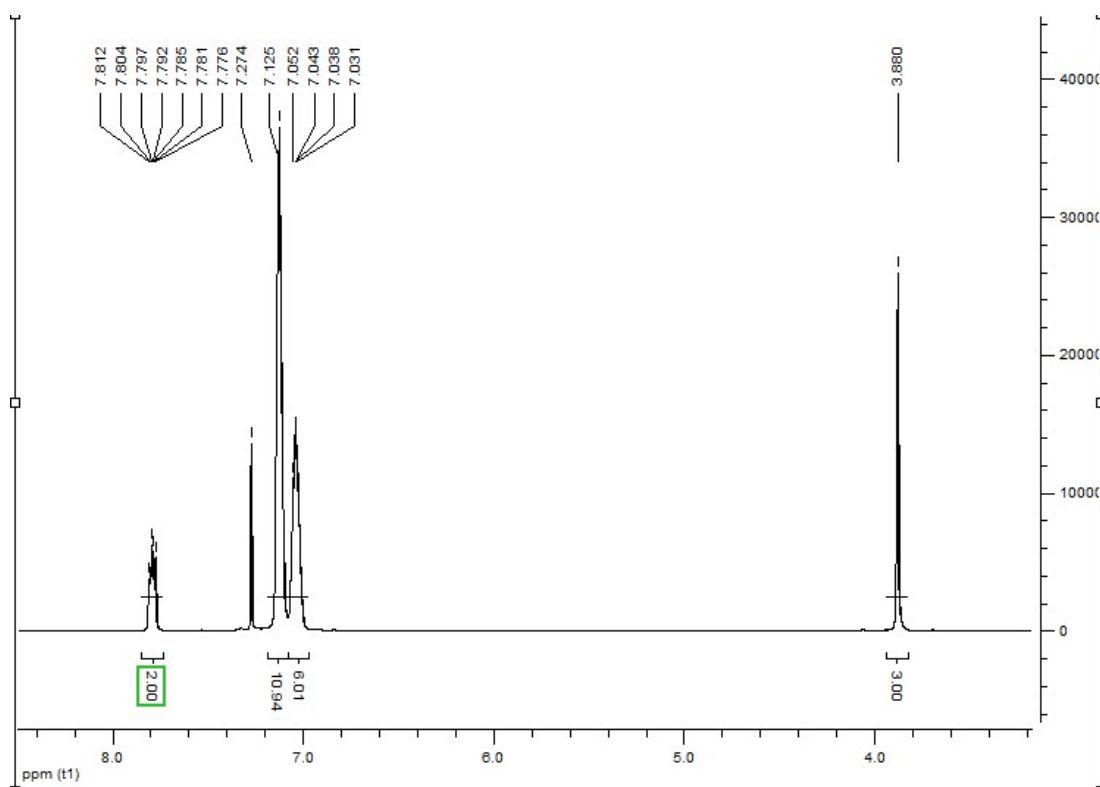

**Fig. S16** <sup>1</sup>H NMR (400 MHz) spectrum of compound 3.

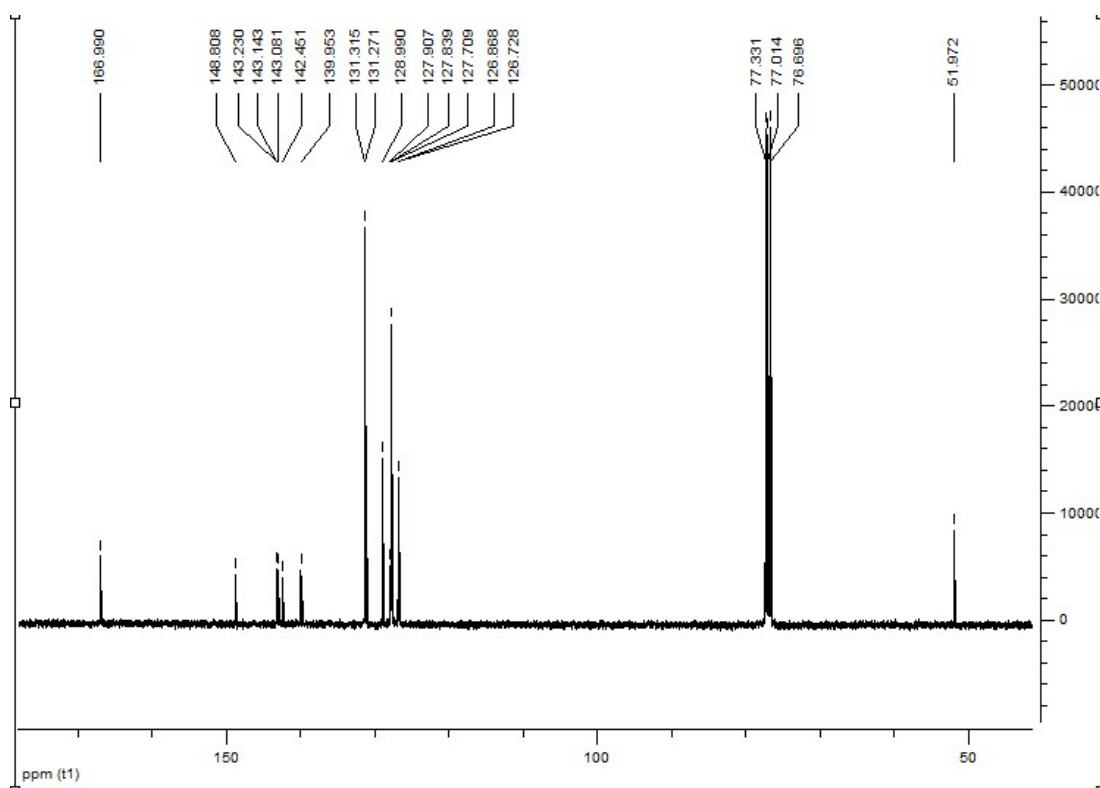

**Fig. S17** <sup>13</sup>C NMR (100 MHz) spectrum of compound 3.

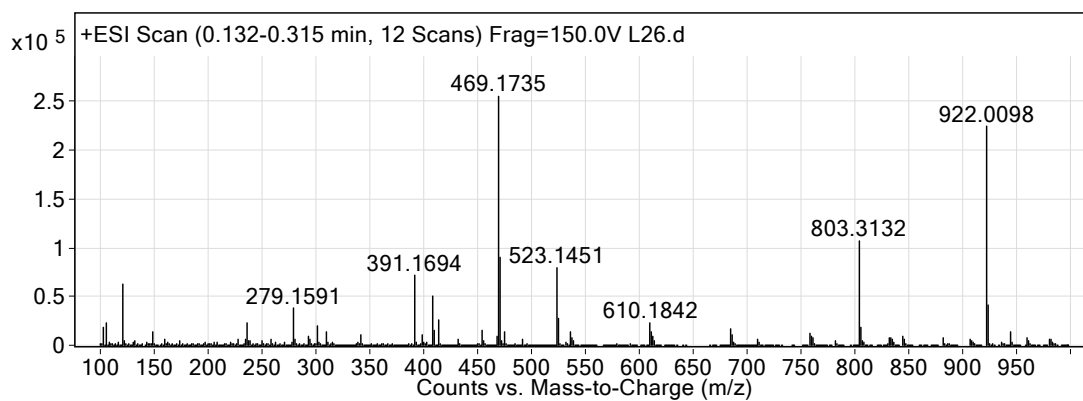

**Fig. S18** TOF LC/MS spectrum of compound **3**.

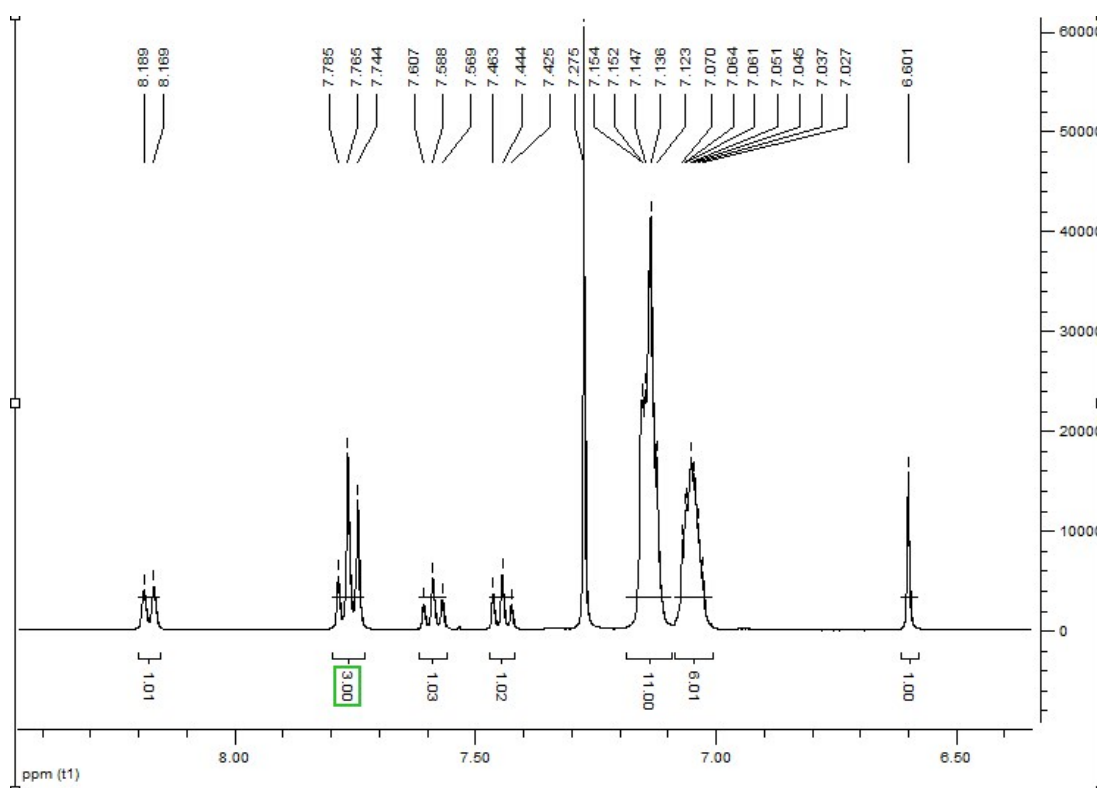

**Fig. S19** <sup>1</sup>H NMR (400 MHz) spectrum of compound **TTPE-H**.

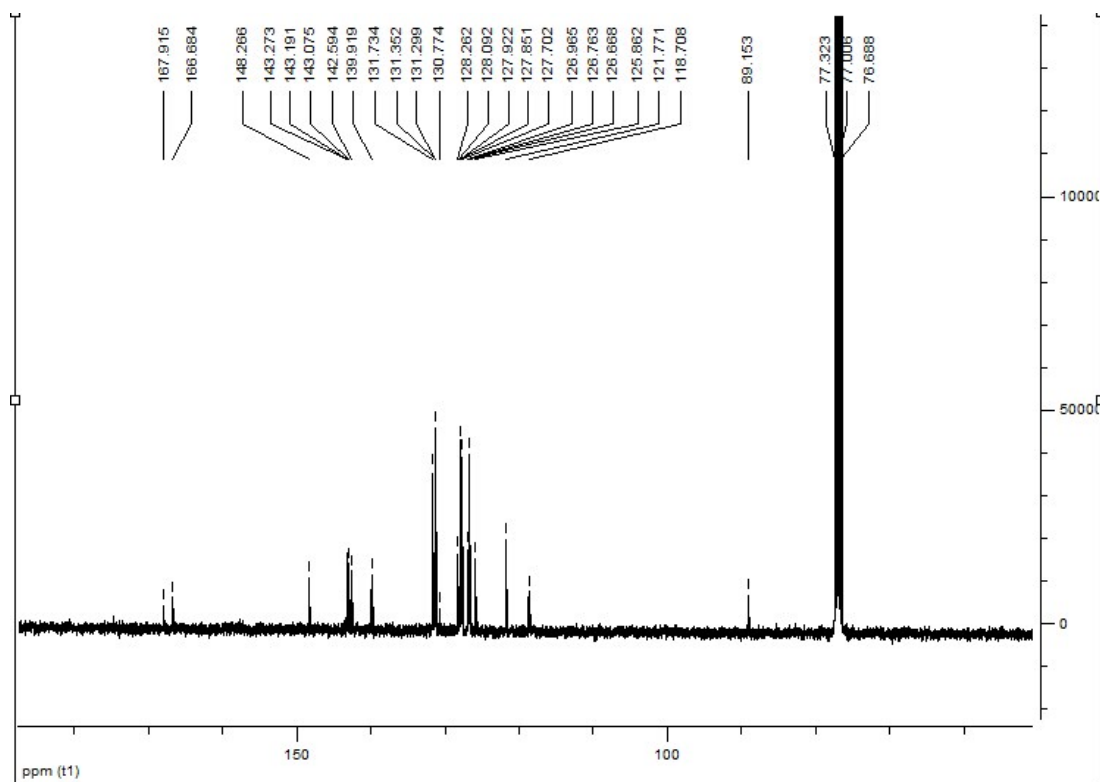

**Fig. S20**  $^{13}\text{C}$  NMR (100 MHz) spectrum of compound **TTPE-H**.

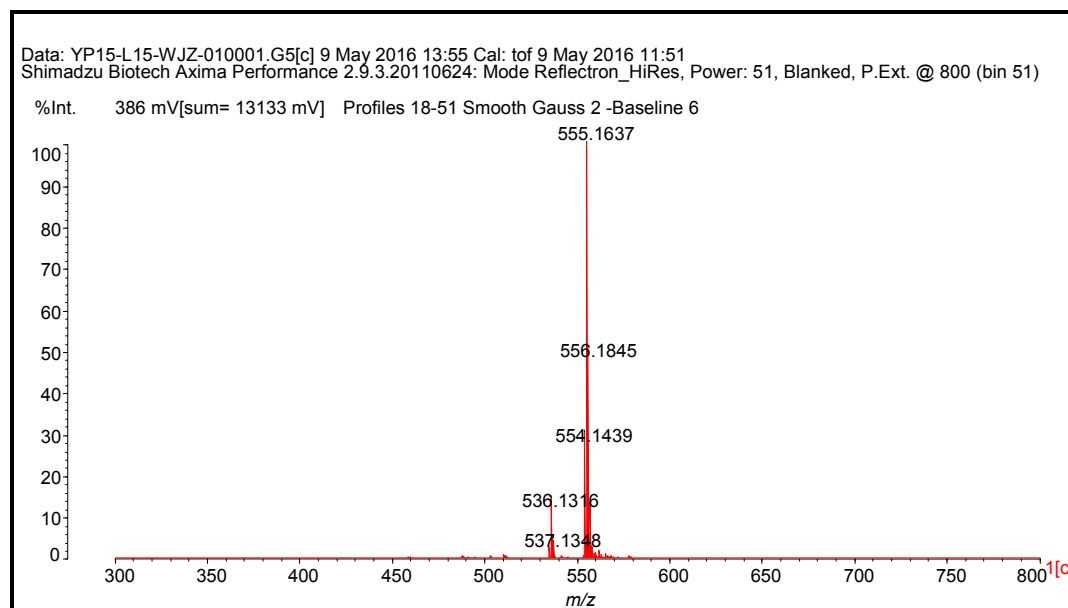

**Fig. S21** MALDI/TOF MS spectrum of compound **TTPE-H**.

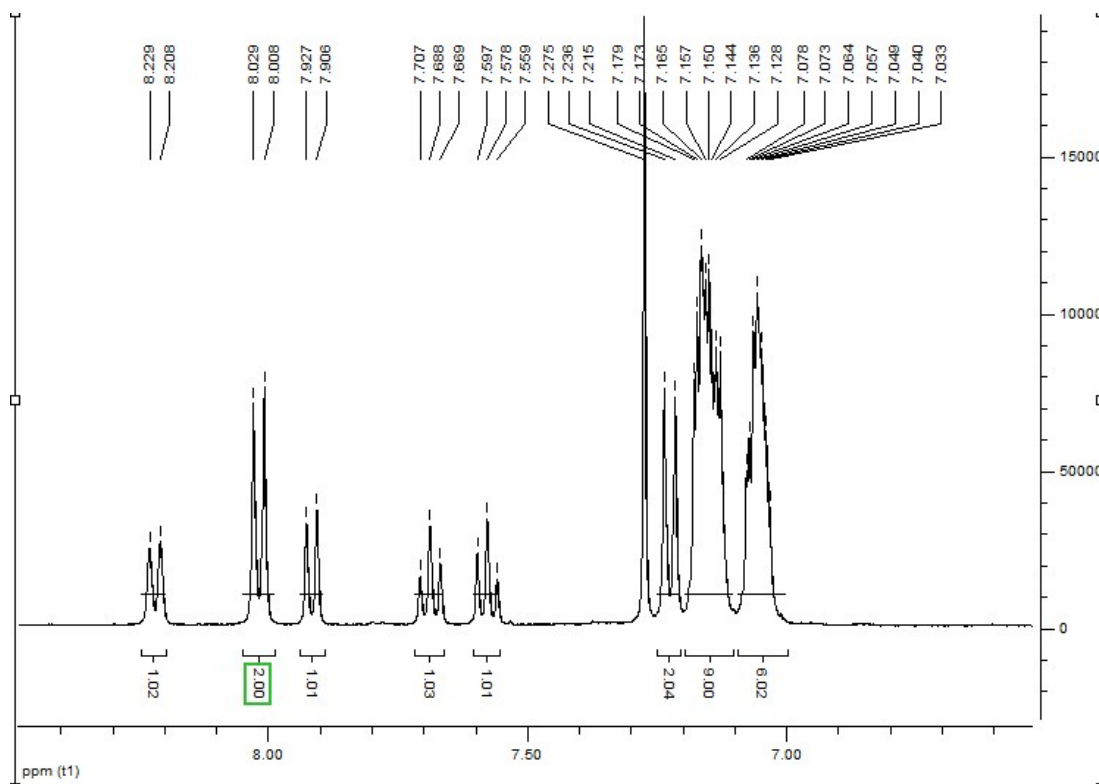

**Fig. S22**  $^1\text{H}$  NMR (400 MHz) spectrum of compound TTPE-CN.

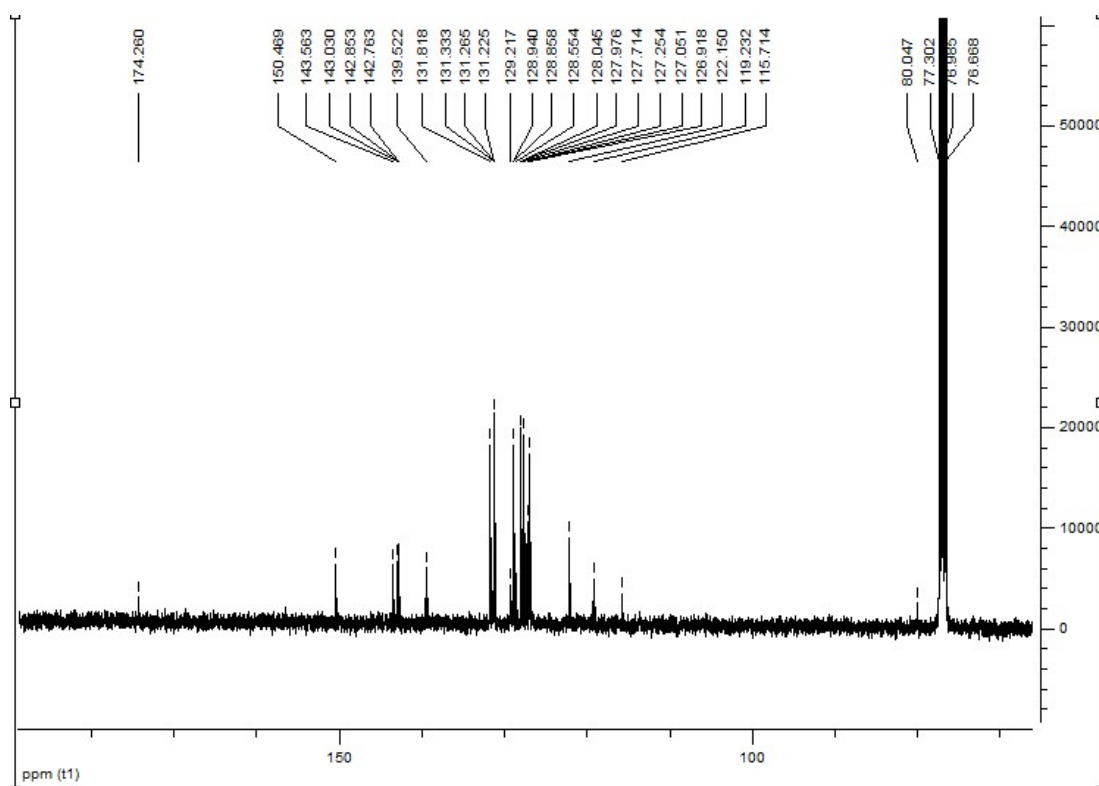

**Fig. S23**  $^{13}\text{C}$  NMR (100 MHz) spectrum of compound TTPE-CN.



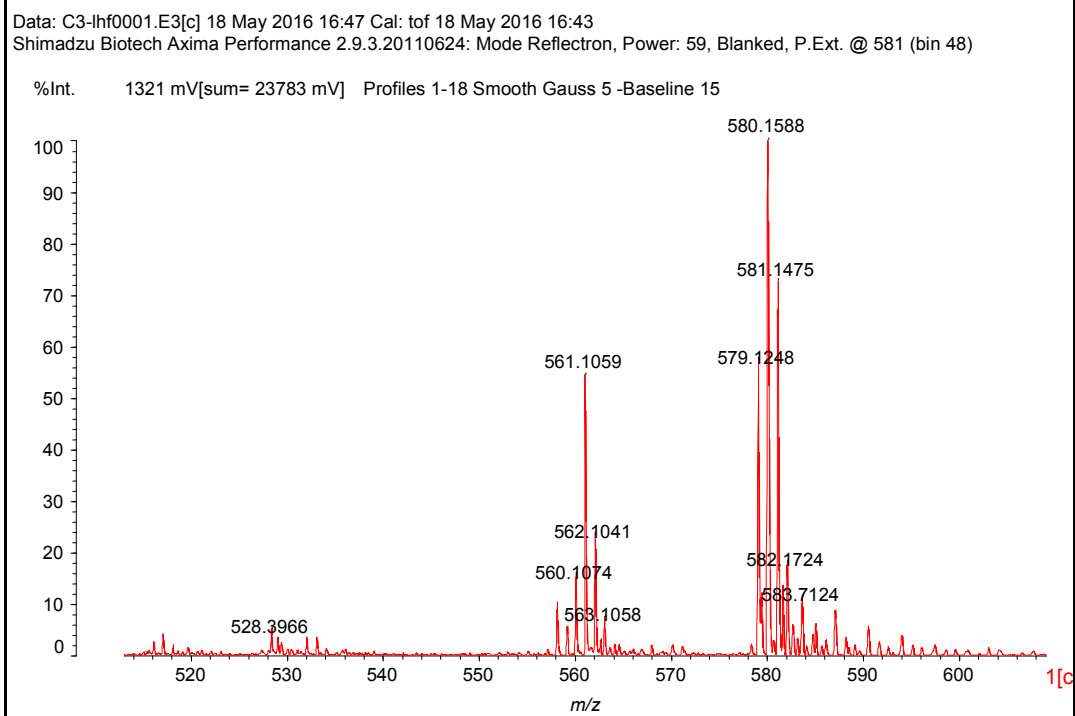

**Fig. S24** MALDI/TOF MS spectrum of compound **TTPE-CN**.
